# Supplementary material
Source: publisher figshare collection journal article supplement (https://asha.figshare.com/articles/dataset/_/9108386)
Supplement: Supplementary file 1 [file 1]

## Supplemental Material S2. Search strategy.

### *Search Characteristics*

| Database                       | Search Date    | Search type           | Search Fields      | Years | Refinements               |
|--------------------------------|----------------|-----------------------|--------------------|-------|---------------------------|
| Academic Search Complete/EBSCO | 10th Sept 2017 | Advanced              | Abstract           | All   | PR Journals, CINAHL, ERIC |
| LLBA                           | 10th Sept 2017 | Advanced              | Abstract           | All   | PR Journals               |
| PsycINFO                       | 10th Sept 2017 | Advanced, Multi-Field | Abstract           | All   | None                      |
| PubMed                         | 10th Sept 2017 | Advanced              | Abstract (Endnote) | All   | None                      |

### *Search Results*

| Terms combined with AND |          |              | Number of records returned |      |          |        |
|-------------------------|----------|--------------|----------------------------|------|----------|--------|
|                         |          |              | EBSCO                      | LLBA | PsycINFO | PubMed |
| Deaf                    | Language | Intervention | 322                        | 79   | 239      | 226    |
| Deaf                    | Language | Strategy     | 202                        | 137  | 87       | 81     |
| Deaf                    | Language | Approach     | 388                        | 160  | 260      | 157    |
| Deaf                    | Language | Therapy      | 77                         | 29   | 87       | 297    |
| Deaf                    | Speech   | Intervention | 111                        | 39   | 88       | 179    |
| Deaf                    | Speech   | Strategy     | 74                         | 81   | 30       | 105    |
| Deaf                    | Speech   | Approach     | 68                         | 53   | 75       | 120    |
| Deaf                    | Speech   | Therapy      | 36                         | 36   | 59       | 451    |
| Deaf                    | Reading  | Intervention | 82                         | 29   | 69       | 41     |
| Deaf                    | Reading  | Strategy     | 109                        | 71   | 56       | 38     |
| Deaf                    | Reading  | Approach     | 61                         | 39   | 65       | 39     |
| Deaf                    | Reading  | Therapy      | 5                          | 5    | 15       | 47     |
| Deaf                    | Writing  | Intervention | 15                         | 9    | 12       | 6      |
| Deaf                    | Writing  | Strategy     | 29                         | 19   | 6        | 5      |
| Deaf                    | Writing  | Approach     | 33                         | 28   | 32       | 15     |

| Terms combined with AND |          |              | Number of records returned |      |          |        |
|-------------------------|----------|--------------|----------------------------|------|----------|--------|
|                         |          |              | EBSCO                      | LLBA | PsycINFO | PubMed |
| Deaf                    | Writing  | Therapy      | 0                          | 1    | 3        | 8      |
| Hearing                 | Language | Intervention | 596                        | 221  | 555      | 781    |
| Hearing                 | Language | Strategy     | 295                        | 169  | 87       | 172    |
| Hearing                 | Language | Approach     | 303                        | 177  | 317      | 350    |
| Hearing                 | Language | Therapy      | 182                        | 102  | 214      | 1256   |
| Hearing                 | Speech   | Intervention | 540                        | 183  | 424      | 1111   |
| Hearing                 | Speech   | Strategy     | 362                        | 174  | 112      | 483    |
| Hearing                 | Speech   | Approach     | 312                        | 161  | 315      | 892    |
| Hearing                 | Speech   | Therapy      | 229                        | 137  | 294      | 3096   |
| Hearing                 | Reading  | Intervention | 111                        | 139  | 107      | 97     |
| Hearing                 | Reading  | Strategy     | 115                        | 67   | 55       | 43     |
| Hearing                 | Reading  | Approach     | 87                         | 45   | 100      | 81     |
| Hearing                 | Reading  | Therapy      | 17                         | 9    | 38       | 170    |
| Hearing                 | Writing  | Intervention | 27                         | 19   | 23       | 15     |
| Hearing                 | Writing  | Strategy     | 23                         | 18   | 5        | 5      |
| Hearing                 | Writing  | Approach     | 32                         | 26   | 43       | 18     |
| Hearing                 | Writing  | Therapy      | 7                          | 3    | 12       | 42     |
| Bilingual               | Language | Intervention | 224                        | 127  | 238      | 139    |
| Bilingual               | Language | Strategy     | 405                        | 593  | 147      | 50     |
| Bilingual               | Language | Approach     | 504                        | 810  | 544      | 159    |
| Bilingual               | Language | Therapy      | 50                         | 57   | 120      | 202    |
| Bilingual               | Speech   | Intervention | 37                         | 24   | 48       | 139    |
| Bilingual               | Speech   | Strategy     | 35                         | 83   | 17       | 8      |
| Bilingual               | Speech   | Approach     | 37                         | 83   | 55       | 26     |
| Bilingual               | Speech   | Therapy      | 26                         | 34   | 44       | 66     |
| Bilingual               | Reading  | Intervention | 56                         | 29   | 70       | 15     |

| Terms combined with AND |          |              | Number of records returned |      |          |        |
|-------------------------|----------|--------------|----------------------------|------|----------|--------|
|                         |          |              | EBSCO                      | LLBA | PsycINFO | PubMed |
| Bilingual               | Reading  | Strategy     | 87                         | 118  | 42       | 5      |
| Bilingual               | Reading  | Approach     | 68                         | 82   | 67       | 14     |
| Bilingual               | Reading  | Therapy      | 1                          | 3    | 3        | 19     |
| Bilingual               | Writing  | Intervention | 6                          | 5    | 16       | 1      |
| Bilingual               | Writing  | Strategy     | 33                         | 54   | 8        | 1      |
| Bilingual               | Writing  | Approach     | 52                         | 70   | 41       | 3      |
| Bilingual               | Writing  | Therapy      | 0                          | 3    | 4        | 9      |
| Multilingual            | Language | Intervention | 61                         | 45   | 47       | 40     |
| Multilingual            | Language | Strategy     | 135                        | 222  | 29       | 13     |
| Multilingual            | Language | Approach     | 249                        | 471  | 201      | 78     |
| Multilingual            | Language | Therapy      | 24                         | 17   | 30       | 68     |
| Multilingual            | Speech   | Intervention | 12                         | 13   | 16       | 13     |
| Multilingual            | Speech   | Strategy     | 12                         | 25   | 2        | 3      |
| Multilingual            | Speech   | Approach     | 24                         | 55   | 33       | 12     |
| Multilingual            | Speech   | Therapy      | 13                         | 11   | 16       | 31     |
| Multilingual            | Reading  | Intervention | 11                         | 13   | 8        | 2      |
| Multilingual            | Reading  | Strategy     | 10                         | 25   | 2        | 2      |
| Multilingual            | Reading  | Approach     | 12                         | 55   | 17       | 1      |
| Multilingual            | Reading  | Therapy      | 1                          | 11   | 2        | 7      |
| Multilingual            | Writing  | Intervention | 2                          | 0    | 3        | 1      |
| Multilingual            | Writing  | Strategy     | 14                         | 27   | 1        | 0      |
| Multilingual            | Writing  | Approach     | 19                         | 38   | 15       | 3      |
| Multilingual            | Writing  | Therapy      | 0                          | 0    | 1        | 2      |
| "Language Learner"      | Language | Intervention | 34                         | 12   | 45       | 6      |
| "Language Learner"      | Language | Strategy     | 91                         | 77   | 24       | 0      |
| "Language Learner"      | Language | Approach     | 78                         | 101  | 62       | 7      |

| Terms combined with AND  |          |              | Number of records returned |      |          |        |
|--------------------------|----------|--------------|----------------------------|------|----------|--------|
|                          |          |              | EBSCO                      | LLBA | PsycINFO | PubMed |
| "Language Learner"       | Language | Therapy      | 1                          | 0    | 1        | 2      |
| "Language Learner"       | Speech   | Intervention | 1                          | 0    | 1        | 0      |
| "Language Learner"       | Speech   | Strategy     | 4                          | 4    | 1        | 0      |
| "Language Learner"       | Speech   | Approach     | 2                          | 12   | 2        | 0      |
| "Language Learner"       | Speech   | Therapy      | 0                          | 0    | 0        | 0      |
| "Language Learner"       | Reading  | Intervention | 20                         | 3    | 23       | 3      |
| "Language Learner"       | Reading  | Strategy     | 15                         | 8    | 11       | 0      |
| "Language Learner"       | Reading  | Approach     | 15                         | 13   | 9        | 0      |
| "Language Learner"       | Reading  | Therapy      | 0                          | 0    | 0        | 0      |
| "Language Learner"       | Writing  | Intervention | 2                          | 0    | 1        | 0      |
| "Language Learner"       | Writing  | Strategy     | 7                          | 3    | 0        | 0      |
| "Language Learner"       | Writing  | Approach     | 8                          | 10   | 1        | 0      |
| "Language Learner"       | Writing  | Therapy      | 0                          | 0    | 0        | 0      |
| "Linguistically Diverse" | Language | Intervention | 58                         | 19   | 73       | 25     |
| "Linguistically Diverse" | Language | Strategy     | 85                         | 23   | 12       | 9      |
| "Linguistically Diverse" | Language | Approach     | 84                         | 30   | 68       | 33     |
| "Linguistically Diverse" | Language | Therapy      | 7                          | 1    | 12       | 5      |
| "Linguistically Diverse" | Speech   | Intervention | 14                         | 5    | 15       | 8      |
| "Linguistically Diverse" | Speech   | Strategy     | 7                          | 4    | 4        | 2      |
| "Linguistically Diverse" | Speech   | Approach     | 12                         | 4    | 9        | 3      |
| "Linguistically Diverse" | Speech   | Therapy      | 2                          | 1    | 6        | 3      |
| "Linguistically Diverse" | Reading  | Intervention | 17                         | 5    | 23       | 3      |
| "Linguistically Diverse" | Reading  | Strategy     | 23                         | 5    | 2        | 0      |
| "Linguistically Diverse" | Reading  | Approach     | 13                         | 3    | 11       | 1      |
| "Linguistically Diverse" | Reading  | Therapy      | 0                          | 0    | 1        | 0      |
| "Linguistically Diverse" | Writing  | Intervention | 5                          | 1    | 9        | 0      |

| Terms combined with AND  |          |              | Number of records returned |      |          |        |
|--------------------------|----------|--------------|----------------------------|------|----------|--------|
|                          |          |              | EBSCO                      | LLBA | PsycINFO | PubMed |
| "Linguistically Diverse" | Writing  | Strategy     | 12                         | 5    | 4        | 1      |
| "Linguistically Diverse" | Writing  | Approach     | 10                         | 3    | 9        | 2      |
| "Linguistically Diverse" | Writing  | Therapy      | 0                          | 0    | 1        | 0      |
| "English Learner"        | Language | Intervention | 5                          | 2    | 13       | 0      |
| "English Learner"        | Language | Strategy     | 13                         | 7    | 5        | 0      |
| "English Learner"        | Language | Approach     | 7                          | 1    | 11       | 0      |
| "English Learner"        | Language | Therapy      | 0                          | 0    | 0        | 0      |
| "English Learner"        | Speech   | Intervention | 1012                       | 0    | 0        | 0      |
| "English Learner"        | Speech   | Strategy     | 0                          | 0    | 0        | 0      |
| "English Learner"        | Speech   | Approach     | 1                          | 0    | 0        | 0      |
| "English Learner"        | Speech   | Therapy      | 0                          | 0    | 0        | 0      |
| "English Learner"        | Reading  | Intervention | 7                          | 4    | 19       | 0      |
| "English Learner"        | Reading  | Strategy     | 4                          | 4    | 4        | 0      |
| "English Learner"        | Reading  | Approach     | 4                          | 1    | 5        | 0      |
| "English Learner"        | Reading  | Therapy      | 0                          | 0    | 0        | 0      |
| "English Learner"        | Writing  | Intervention | 2                          | 0    | 0        | 0      |
| "English Learner"        | Writing  | Strategy     | 1                          | 0    | 0        | 0      |
| "English Learner"        | Writing  | Approach     | 1                          | 0    | 0        | 0      |
| "English Learner"        | Writing  | Therapy      | 0                          | 0    | 0        | 0      |
